# Supplementary material
Source: PubMed Central journal article supplement (PMC3118585)
Supplement: supp_00707.2010_tableS1.pdf [file supp_00707.2010_tableS1.pdf]

**Supplemental Table 1. Descriptive statistics for metabolic and exercise traits in progenitor lines**

| <b>Trait</b>              | <b>N</b> | <b>Mean (95% CI)</b> | <b>SD</b> | <b>Minimum</b> | <b>Maximum</b> |
|---------------------------|----------|----------------------|-----------|----------------|----------------|
| <b>Pre-Exercise</b>       |          |                      |           |                |                |
| Body weight (g)           |          |                      |           |                |                |
| 129S1/SlvmJ               | 10       | 26.47 (24.56, 28.37) | 2.66494   | 21.93          | 30.32          |
| A/J                       | 9        | 22.74 (20.87, 24.62) | 2.44266   | 19.89          | 26.60          |
| C57BL6/J                  | 11       | 27.68 (26.60, 28.76) | 1.60776   | 25.22          | 30.66          |
| CAST/EJ                   | 11       | 16.95 (16.52, 17.38) | .63594    | 15.95          | 17.81          |
| NOD/LtJ                   | 7        | 27.58 (26.48, 28.68) | 1.19141   | 26.25          | 29.38          |
| NZO/H1LtJ                 | 9        | 45.7 (44.84, 46.55)  | 1.11469   | 44.00          | 47.80          |
| PWK/PhJ                   | 10       | 16.84 (16.43, 17.26) | .57382    | 16.18          | 18.02          |
| WSB/EiJ                   | 7        | 14.57 (13.59, 15.56) | 1.06411   | 13.45          | 16.40          |
| PreCC                     | 176      | 23.74 (23.15, 24.33) | 3.95      | 15.01          | 35.5           |
| Body fat percentage (%)   |          |                      |           |                |                |
| 129S1/SlvmJ               | 10       | 9.49 (7.67, 11.32)   | 2.54916   | 5.11           | 12.96          |
| A/J                       | 9        | 8.02 (4.51, 11.52)   | 4.56043   | 2.36           | 17.14          |
| C57BL6/J                  | 10       | 7.42 (5.80, 9.05)    | 2.26710   | 4.97           | 12.43          |
| CAST/EJ                   | 11       | 5.64 (4.53, 6.75)    | 1.65085   | 3.54           | 8.73           |
| NOD/LtJ                   | 7        | 8.03 (6.64, 9.42)    | 1.50156   | 5.38           | 9.47           |
| NZO/H1LtJ                 | 9        | 27.81 (25.18, 30.43) | 3.41386   | 22.00          | 32.56          |
| PWK/PhJ                   | 9        | 5.61 (4.58, 6.64)    | 1.33668   | 3.42           | 6.96           |
| WSB/EiJ                   | 7        | 6.05 (4.11, 7.99)    | 2.09658   | 3.20           | 8.96           |
| PreCC                     | 176      | 9.23 (8.56, 9.91)    | 4.91      | 1.09           | 31.65          |
| Food intake (kcal/day/BW) |          |                      |           |                |                |
| 129S1/SlvmJ               | 10       | 0.54 (0.48, 0.59)    | 0.07691   | 0.4            | 0.65           |
| A/J                       | 8        | 0.55 (0.46, 0.64)    | 0.10673   | 0.42           | 0.72           |
| C57BL6/J                  | 11       | 0.45 (0.40, 0.49)    | 0.06831   | 0.34           | 0.59           |
| CAST/EJ                   | 11       | 0.89 (0.67, 1.12)    | 0.33115   | 0.5            | 1.49           |
| NOD/LtJ                   | 7        | 0.51 (0.46, 0.57)    | 0.06239   | 0.42           | 0.57           |
| NZO/H1LtJ                 | 9        | 0.56 (0.41, 0.71)    | 0.20024   | 0.29           | 0.92           |
| PWK/PhJ                   | 11       | 0.67 (0.60, 0.74)    | 0.10562   | 0.45           | 0.82           |
| WSB/EiJ                   | 6        | 0.74 (0.69, 0.79)    | 0.04769   | 0.7            | 0.83           |
| PreCC                     | 174      | 0.61 (0.58, 0.64)    | 0.21      | 0.29           | 2.42           |
| Nocturnal RER             |          |                      |           |                |                |
| 129S1/SlvmJ               | 7        | 0.96 (0.91, 1.01)    | 0.05616   | 0.91           | 1.04           |
| A/J                       | 7        | 0.88 (0.80, 0.96)    | 0.09037   | 0.79           | 1.03           |
| C57BL6/J                  | 8        | 1.05 (1.02, 1.09)    | 0.04149   | 1              | 1.11           |
| CAST/EJ                   | 8        | 0.94 (0.89, 0.99)    | 0.05692   | 0.86           | 1.03           |
| NOD/LtJ                   | 7        | 1.02 (0.97, 1.07)    | 0.05548   | 0.93           | 1.09           |
| NZO/H1LtJ                 | 7        | 0.86 (0.84, 0.89)    | 0.02495   | 0.83           | 0.91           |
| PWK/PhJ                   | 8        | 0.92 (0.87, 0.96)    | 0.05299   | 0.85           | 1.01           |
| WSB/EiJ                   | 6        | 0.92 (0.88, 0.96)    | 0.03764   | 0.87           | 0.97           |
| PreCC                     | 130      | 0.92 (0.90, 0.93)    | 0.09      | 0.69           | 1.12           |

**Exercise Traits****Running Distances (m)**

Day 1

|             |     |                             |         |         |          |
|-------------|-----|-----------------------------|---------|---------|----------|
| 129S1/SlvmJ | 10  | 2058.50 (662.82, 3454.19)   | 1951.03 | 0.37    | 6427.76  |
| A/J         | 10  | 715.16 (23.23, 1407.08)     | 967.241 | 0       | 2758.43  |
| C57BL6/J    | 11  | 3763.84 (2766.10, 4761.56)  | 1485.14 | 2100.91 | 6586.98  |
| CAST/EJ     | 11  | 7348.85 (6129.76, 8567.94)  | 1814.64 | 3711.03 | 10223.77 |
| NOD/LtJ     | 7   | 6575.46 (4841.37, 8309.55)  | 1875    | 3272.68 | 9010.56  |
| NZO/H1LtJ   | 9   | 743.14 (375.33, 1110.96)    | 478.509 | 22.18   | 1615.17  |
| PWK/PhJ     | 11  | 7232.84 (5503.42, 8962.25)  | 2574.26 | 4002.63 | 12571.53 |
| WSB/EiJ     | 7   | 8053.97 (5553.17, 10554.76) | 2704.02 | 4533.01 | 11895.22 |
| PreCC       | 176 | 4096.73 (3632.35, 4561.11)  | 3121.51 | 0       | 14940.84 |

Days 5 and 6

|             |     |                             |         |         |          |
|-------------|-----|-----------------------------|---------|---------|----------|
| 129S1/SlvmJ | 10  | 2254.17 (853.49, 3654.84)   | 1958.01 | 0       | 5106.48  |
| A/J         | 10  | 1648.37 (484.34, 2812.41)   | 1627.21 | 0       | 4134.72  |
| C57BL6/J    | 11  | 6318.43 (5235.09, 7401.77)  | 1612.57 | 4133.94 | 9580.91  |
| CAST/EJ     | 11  | 7278.01 (6291.84, 8264.18)  | 1467.93 | 4524.81 | 9599.29  |
| NOD/LtJ     | 7   | 7262.53 (5776.83, 8748.23)  | 1606.43 | 5443.4  | 10212.17 |
| NZO/H1LtJ   | 9   | 527.00 (281.18, 772.82)     | 319.797 | 6.05    | 937.66   |
| PWK/PhJ     | 11  | 8913.05 (6940.63, 10885.47) | 2935.98 | 3234.6  | 13578.17 |
| WSB/EiJ     | 6   | 9493.09 (7167.84, 11818.35) | 2215.72 | 6789.43 | 13311.65 |
| PreCC       | 176 | 4850.18 (4404.45, 5295.91)  | 2996.16 | 0.97    | 16557.57 |

Days 11 and 12

|             |     |                             |         |         |          |
|-------------|-----|-----------------------------|---------|---------|----------|
| 129S1/SlvmJ | 10  | 2089.21 (730.81, 3447.61)   | 1898.91 | 53.31   | 5768.68  |
| A/J         | 10  | 1887.09 (755.26, 3018.91)   | 1582.19 | 0       | 5352.1   |
| C57BL6/J    | 11  | 5643.20 (3721.96, 7564.43)  | 2859.8  | 2848.55 | 11248.69 |
| CAST/EJ     | 11  | 9226.84 (8431.88, 10021.80) | 1183.31 | 6764    | 11141.26 |
| NOD/LtJ     | 7   | 5956.66 (4955.00, 6958.31)  | 1083.05 | 4627.01 | 7631.94  |
| NZO/H1LtJ   | 9   | 425.88 (224.50, 627.27)     | 261.987 | 5.6     | 863.18   |
| PWK/PhJ     | 11  | 8993.85 (6997.46, 10990.24) | 2971.66 | 3409.45 | 13195.79 |
| WSB/EiJ     | 7   | 8749.08 (5953.29, 11544.87) | 3022.98 | 4009.64 | 12915.52 |
| PreCC       | 175 | 5610.96 (5047.28, 6174.63)  | 3778.03 | 10.91   | 19333.33 |

**Running Speeds (m/min)**

Day 1

|             |     |                      |         |       |       |
|-------------|-----|----------------------|---------|-------|-------|
| 129S1/SlvmJ | 10  | 5.97 (3.15, 8.79)    | 3.94291 | 0     | 13.14 |
| A/J         | 10  | 2.46 (0.65, 4.28)    | 2.53808 | 0     | 7.45  |
| C57BL6/J    | 11  | 8.24 (7.03, 9.46)    | 1.81242 | 5.76  | 11.41 |
| CAST/EJ     | 11  | 9.95 (8.90, 11.00)   | 1.5694  | 7.02  | 12.7  |
| NOD/LtJ     | 7   | 13.65 (12.02, 15.28) | 1.76471 | 11.22 | 16.64 |
| NZO/H1LtJ   | 9   | 3.68 (2.62, 4.74)    | 1.37804 | 0.74  | 5.28  |
| PWK/PhJ     | 11  | 11.15 (9.69, 12.62)  | 2.18051 | 7.32  | 14.05 |
| WSB/EiJ     | 7   | 12.52 (10.53, 14.50) | 2.14473 | 8.7   | 16.03 |
| PreCC       | 176 | 8.63 (8.01, 9.24)    | 4.13    | 0     | 17.52 |

### Days 5 and 6

|             |     |                      |         |       |       |
|-------------|-----|----------------------|---------|-------|-------|
| 129S1/SlvmJ | 10  | 10.20 (5.50, 14.90)  | 6.56509 | 0     | 20.92 |
| A/J         | 10  | 6.35 (2.87, 9.83)    | 4.8647  | 0     | 13.74 |
| C57BL6/J    | 11  | 16.48 (15.46, 17.51) | 1.52171 | 13.65 | 18.56 |
| CAST/EJ     | 11  | 14.64 (13.41, 15.86) | 1.81993 | 11.2  | 17.88 |
| NOD/LtJ     | 7   | 18.36 (17.13, 19.59) | 1.33164 | 16.71 | 20.42 |
| NZO/H1LtJ   | 9   | 6.00 (3.76, 8.25)    | 2.91832 | 0.43  | 10.02 |
| PWK/PhJ     | 11  | 15.85 (13.71, 18.00) | 3.19402 | 11.98 | 23.59 |
| WSB/EiJ     | 6   | 19.30 (16.12, 22.48) | 3.02998 | 14.95 | 24.12 |
| PreCC       | 176 | 13.66 (12.92, 14.40) | 4.95    | 0.16  | 28.1  |

### Days 11 and 12

|             |     |                      |         |       |       |
|-------------|-----|----------------------|---------|-------|-------|
| 129S1/SlvmJ | 10  | 10.52 (5.25, 15.79)  | 7.36695 | 0     | 23.38 |
| A/J         | 10  | 7.34 (4.09, 10.58)   | 4.53532 | 0     | 12.73 |
| C57BL6/J    | 11  | 18.23 (16.38, 20.07) | 2.748   | 13.7  | 22.5  |
| CAST/EJ     | 11  | 17.06 (15.46, 18.66) | 2.38345 | 13.39 | 20.96 |
| NOD/LtJ     | 7   | 18.67 (17.56, 19.77) | 1.19541 | 17.6  | 20.48 |
| NZO/H1LtJ   | 9   | 6.54 (3.88, 9.19)    | 3.44865 | 0.62  | 11.79 |
| PWK/PhJ     | 11  | 16.11 (14.48, 17.74) | 2.42502 | 12.3  | 20.98 |
| WSB/EiJ     | 7   | 19.17 (15.09, 23.25) | 4.41426 | 14.08 | 26.91 |
| PreCC       | 175 | 15.54 (14.64, 16.43) | 6       | 0.85  | 33.63 |

### Food intake (kcal/day/BW)

|             |     |                   |         |      |      |
|-------------|-----|-------------------|---------|------|------|
| 129S1/SlvmJ | 10  | 0.54 (0.48, 0.60) | 0.08347 | 0.4  | 0.65 |
| A/J         | 9   | 0.60 (0.52, 0.67) | 0.10363 | 0.43 | 0.76 |
| C57BL6/J    | 10  | 0.56 (0.53, 0.59) | 0.04672 | 0.49 | 0.64 |
| CAST/EJ     | 11  | 0.98 (0.87, 1.08) | 0.16099 | 0.82 | 1.26 |
| NOD/LtJ     | 7   | 0.58 (0.55, 0.60) | 0.03168 | 0.54 | 0.63 |
| NZO/H1LtJ   | 7   | 0.46 (0.39, 0.53) | 0.07815 | 0.36 | 0.6  |
| PWK/PhJ     | 10  | 0.81 (0.76, 0.86) | 0.06646 | 0.7  | 0.9  |
| WSB/EiJ     | 7   | 0.82 (0.74, 0.90) | 0.08705 | 0.72 | 0.96 |
| PreCC       | 175 | 0.65 (0.63, 0.67) | 0.12    | 0.29 | 1.33 |

### Post Exercise

#### Body weight (g)

|             |     |                      |         |       |       |
|-------------|-----|----------------------|---------|-------|-------|
| 129S1/SlvmJ | 10  | 27.73 (25.21, 30.24) | 3.51353 | 22.7  | 31.76 |
| A/J         | 10  | 23.85 (22.31, 25.39) | 2.15414 | 19.94 | 27.52 |
| C57BL6/J    | 11  | 26.62 (25.45, 27.78) | 1.73555 | 23.64 | 29.84 |
| CAST/EJ     | 11  | 16.36 (15.99, 16.72) | 0.5448  | 15.47 | 17.38 |
| NOD/LtJ     | 7   | 27.81 (27.02, 28.59) | 0.84737 | 27.2  | 29.57 |
| NZO/H1LtJ   | 9   | 43.57 (41.52, 45.26) | 2.66652 | 40.16 | 48.18 |
| PWK/PhJ     | 11  | 18.23 (17.76, 18.70) | 0.7019  | 17.41 | 19.8  |
| WSB/EiJ     | 7   | 15.85 (14.98, 16.73) | 0.94841 | 14.49 | 17.65 |
| PreCC       | 176 | 23.88 (23.32, 24.45) | 3.78    | 14.7  | 36.34 |

Body fat percentage (%)

|             |     |                     |         |       |       |
|-------------|-----|---------------------|---------|-------|-------|
| 129S1/SlvmJ | 10  | 9.50 (7.07, 11.92)  | 3.39517 | 4.17  | 13.3  |
| A/J         | 10  | 10.44 (8.74, 12.13) | 2.37339 | 5.29  | 13.16 |
| C57BL6/J    | 11  | 5.48 (3.73, 7.23)   | 2.60672 | 2.22  | 11.18 |
| CAST/EJ     | 11  | 4.92 (4.30, 5.54)   | 0.92249 | 3.79  | 7.04  |
| NOD/LtJ     | 7   | 5.21 (4.21, 6.20)   | 1.07436 | 3.41  | 6.54  |
| NZO/H1LtJ   | 9   | 25.5 (21.15, 29.86) | 5.66523 | 16.34 | 32.49 |
| PWK/PhJ     | 11  | 6.50 (5.64, 7.36)   | 1.27798 | 4.49  | 8.38  |
| WSB/EiJ     | 7   | 2.81 (1.97, 3.64)   | 0.90344 | 1.54  | 3.76  |
| PreCC       | 176 | 6.52 (5.92, 7.11)   | 4.02    | 0.62  | 21.71 |

Change in body weight (g)

|             |     |                      |         |       |      |
|-------------|-----|----------------------|---------|-------|------|
| 129S1/SlvmJ | 10  | 1.26 (0.40, 2.12)    | 1.2069  | -0.74 | 3.33 |
| A/J         | 9   | 1.11 (0.02, 2.20)    | 1.41658 | -1.2  | 3.24 |
| C57BL6/J    | 11  | -1.06 (-1.54, -0.59) | 0.7079  | -1.96 | 0.36 |
| CAST/EJ     | 11  | -0.59 (-0.90, -0.28) | 0.45981 | -1.34 | 0.13 |
| NOD/LtJ     | 7   | 0.23 (-0.54, 0.99)   | 0.82865 | -1.29 | 1.17 |
| NZO/H1LtJ   | 9   | -2.12 (-4.31, 0.06)  | 2.8442  | -5.78 | 1.58 |
| PWK/PhJ     | 9   | 1.47 (1.27, 1.66)    | 0.2535  | 1.04  | 1.78 |
| WSB/EiJ     | 7   | 1.28 (0.70, 1.85)    | 0.62189 | 0.37  | 2.28 |
| PreCC       | 176 | 0.14 (-0.16, 0.45)   | 2.08    | -6.57 | 8.35 |

Change in body fat percentage

|             |     |                      |         |        |       |
|-------------|-----|----------------------|---------|--------|-------|
| 129S1/SlvmJ | 9   | 0.54 (-0.41, 1.49)   | 1.23662 | -1.4   | 3.01  |
| A/J         | 9   | 2.23 (-0.59, 5.06)   | 3.68053 | -4.34  | 7.55  |
| C57BL6/J    | 10  | -2.51 (-4.03, -0.99) | 2.12668 | -6.18  | -0.4  |
| CAST/EJ     | 11  | -0.73 (-1.91, 0.46)  | 1.76149 | -4.08  | 1.7   |
| NOD/LtJ     | 7   | -2.82 (-4.71, -0.93) | 2.0427  | -5.78  | -0.36 |
| NZO/H1LtJ   | 9   | -2.31 (-5.31, 0.70)  | 3.90924 | -9.38  | 2.26  |
| PWK/PhJ     | 9   | 0.56 (-0.97, 2.08)   | 1.98724 | -2.48  | 3.81  |
| WSB/EiJ     | 7   | -3.24 (-4.80, -1.68) | 1.6866  | -6.39  | -1.2  |
| PreCC       | 176 | -2.67 (-3.14, -2.19) | 3.17    | -13.95 | 5.5   |

---
