# Supplementary material
Source: PubMed Central journal article supplement (PMC3118585)
Supplement: supp_00707.2010_tableS2.pdf [file supp_00707.2010_tableS2.pdf]

**Supplemental Table 2. Significant expression QTL**

| <b>Chromosome</b> | <b>Gene ID</b>                   | <b>Gene Name</b>                                         |
|-------------------|----------------------------------|----------------------------------------------------------|
| Chr12             | <i>Actn1</i>                     | Actinin, alpha 1                                         |
|                   | <i>Mlh3</i>                      | MutL homolog 3 (E. coli)                                 |
|                   | <i>Pcnx</i>                      | Pecanex homolog (drosophila)                             |
|                   | <i>Acot2</i>                     | Acyl-CoA thioesterase 2                                  |
|                   | <i>Aldh6a1</i>                   | Aldehyde dehydrogenase 6 family, member A1               |
|                   | 2410016O06Rik                    |                                                          |
|                   | <i>Numb</i>                      | Numb gene homolog (drosophila)                           |
|                   | <i>Dcaf4</i>                     | DDB1 and CUL4 associated factor 4                        |
|                   | <i>Ptgr2</i>                     | Prostaglandin reductase 4                                |
|                   | <i>Zfp410</i>                    | Zinc finger protein 410                                  |
|                   | <i>Dlst</i>                      | Dihydrolipoamide S-succinyltransferase                   |
|                   | <i>Isca2</i>                     | Iron-sulfur cluster assembly 2 homolog (S. cerevisiae)   |
|                   | 1110018G07Rik                    |                                                          |
|                   | <i>Acyp1</i>                     | Acylphosphatase 1, erythrocyte (common) type             |
|                   | 1700020O03Rik                    |                                                          |
|                   | <i>Angel1</i>                    | Angel homolog 1 (Drosophila)                             |
|                   | <i>Pomt2</i>                     | Protein-O-mannosyltransferase 2                          |
|                   | <i>Sptlc2</i>                    | Serine palmitoyltransferase, long chain base subunit 2   |
|                   | Chr16                            | <i>Olf201</i>                                            |
| <i>Kalrn</i>      |                                  | Kalirin, RhoGEF kinase                                   |
| <i>Cpn2</i>       |                                  | Carboxypeptidase N, polypeptide 2                        |
| <i>Atp13a3</i>    |                                  | ATPase type 13A3                                         |
| <i>Lsg1</i>       |                                  | Large subunit GTPase 1 homolog                           |
| <i>Zfp148</i>     |                                  | Zinc finger protein 148                                  |
| <i>Dtx3l</i>      |                                  | Deltex 3-like (Drosophila)                               |
| <i>Parp9</i>      |                                  | Poly (ADP-ribose) polymerase family, member 9            |
| 1500031L02Rik     |                                  |                                                          |
| <i>Fam162a</i>    |                                  | Family with sequence similarity 162, member A            |
| <i>Heg1</i>       |                                  | HEG homolog 1 (zebrafish)                                |
| <i>Osbpl11</i>    |                                  | oxysterol binding protein-like 11                        |
| <i>Senp5</i>      |                                  | SUMO/sentrin specific peptidase 5                        |
| <i>Umps</i>       |                                  | Uridine monophosphate synthetase                         |
| <i>Mylk</i>       |                                  | Myosin, light polypeptide kinase                         |
| <i>Pigx</i>       |                                  | Phosphatidylinositol glycan anchor biosynthesis, class X |
| <i>Tnk2</i>       |                                  | Tyrosine kinase, non receptor 2                          |
| <i>Snx4</i>       |                                  | Sorting nexin 4                                          |
| <i>Itgb5</i>      |                                  | Integrin beta 5                                          |
| <i>Lrrc58</i>     |                                  | Leucine-rich repeat-containing protein 58                |
| <i>Sec22a</i>     |                                  | Vesicle-trafficking protein SEC22a                       |
| <i>Gsk3b</i>      | Glycogen synthase kinase 3 beta  |                                                          |
| <i>Cdgap</i>      | Rho GTPase activating protein 31 |                                                          |

## Supplemental Table 2. Significant expression QTL (cont)

| <b>Chromosome</b> | <b>Gene ID</b> | <b>Gene Name</b>                                            |
|-------------------|----------------|-------------------------------------------------------------|
| Chr16             | <i>Ccdc58</i>  | Coiled-coil domain containing 58                            |
|                   | 4930455C21Rik  | Transmembrane protein C3orf1 homolog                        |
|                   | <i>Fbxo40</i>  | F-box protein 40                                            |
|                   | <i>Pdia5</i>   | Protein disulfide isomerase associated 5                    |
|                   | <i>Igsf11</i>  | Immunoglobulin superfamily, member 11                       |
|                   | <i>Pla1a</i>   | Phospholipase A1 member A                                   |
|                   | <i>Rabl3</i>   | RAB, member of RAS oncogene family-like 3                   |
|                   | <i>Atp6v1a</i> | ATPase, H <sup>+</sup> transporting, lysosomal V1 subunit A |
